# Supplementary material for: The Effect of Waning on Antibody Levels and Memory B Cell Recall following SARS-CoV-2 Infection or Vaccination
Source: Vaccines (Basel). 2022 Apr 29;10(5):696. doi: 10.3390/vaccines10050696 (PMC9143792; doi:10.3390/vaccines10050696)
Supplement: Supplementary file 1 [file vaccines-10-00696-s001.zip › Table S1.xlsx]

## Sheet: Sheet1
ID	Age	Gender	Race	Ethnicity	BMI
AUG-001	34	F	White	Not Hispanic or Latino	24.7
AUG-002	49	F	Multiple	Not Hispanic or Latino	21.3
AUG-003	34	F	White	Not Hispanic or Latino	25.4
AUG-004	27	F	White	Not Hispanic or Latino	30.1
AUG-005	27	F	White	Not Hispanic or Latino	28.3
AUG-007	27	F	White	Not Hispanic or Latino	28.6
AUG-008	52	F	Black/African American	Not Hispanic or Latino	47.3
AUG-009	41	F	Black/African American	Not Hispanic or Latino	24.3
AUG-010	47	F	White	Not Hispanic or Latino	26
AUG-011	46	M	White	Not Hispanic or Latino	27.8
AUG-013	41	M	White	Not Hispanic or Latino	25.2
AUG-014	58	M	White	Not Hispanic or Latino	43.2
AUG-015	55	F	Black/African American	Not Hispanic or Latino	34
AUG-016	29	F	White	Not Hispanic or Latino	21.9
AUG-017	33	F	White	Not Hispanic or Latino	33
AUG-018	53	F	White	Not Hispanic or Latino	30.1
AUG-019	33	M	White	Hispanic or Latino	20.4
AUG-020	41	M	White	Not Hispanic or Latino	20.8
AUG-021	46	F	White	Not Hispanic or Latino	22
AUG-022	60	F	White	Not Hispanic or Latino	27.4
AUG-023	37	F	White	Not Hispanic or Latino	28.3
AUG-024	34	F	White	Hispanic or Latino	20.6
AUG-025	52	F	White	Not Hispanic or Latino	32
AUG-026	63	F	White	Not Hispanic or Latino	25.9
AUG-027	40	F	Black/African American	Not Hispanic or Latino	23.1
AUG-028	30	F	White	Not Hispanic or Latino	25.6
AUG-029	43	F	White	Not Hispanic or Latino	25.7
AUG-030	22	F	White	Not Hispanic or Latino	28.7
AUG-031	61	M	White	Not Hispanic or Latino	31.9
AUG-032	34	F	White	Not Hispanic or Latino	30.9
AUG-033	63	F	White	Not Hispanic or Latino	32.3
AUG-034	52	F	Black/African American	Not Hispanic or Latino	41.5
AUG-035	36	F	White	Not Hispanic or Latino	19.7
AUG-036	60	F	White	Not Hispanic or Latino	22
AUG-037	43	F	Asian	Not Hispanic or Latino	31.1
AUG-038	45	F	White	Not Hispanic or Latino	26.2
AUG-039	41	M	White	Not Hispanic or Latino	27.5
AUG-040	37	F	White	Not Hispanic or Latino	46.1
AUG-041	38	F	White	Not Hispanic or Latino	35.6
AUG-043	48	F	White	Not Hispanic or Latino	31.4
AUG-044	34	F	White	Not Hispanic or Latino	22.2
AUG-045	36	F	White	Not Hispanic or Latino	20.9
AUG-046	24	M	White	Not Hispanic or Latino	37.9
AUG-047	44	F	White	Not Hispanic or Latino	29.6
AUG-048	51	F	White	Not Hispanic or Latino	31.8
AUG-050	46	F	Asian	Not Hispanic or Latino	24.2
AUG-051	39	F	Black/African American	Not Hispanic or Latino	39.4
AUG-052	47	F	Black/African American	Not Hispanic or Latino	37.3
AUG-053	42	F	White	Not Hispanic or Latino	38.7
AUG-056	51	F	White	Not Hispanic or Latino	27.1
AUG-057	41	M	White	Not Hispanic or Latino	27.3
AUG-059	43	M	Asian	Not Hispanic or Latino	25.9
AUG-060	34	F	White	Not Hispanic or Latino	32.2
AUG-061	35	M	White	Not Hispanic or Latino	31.2
AUG-063	48	F	White	Not Hispanic or Latino	26.7
AUG-064	42	F	White	Not Hispanic or Latino	36.9
AUG-065	73	M	White	Not Hispanic or Latino	24.6
AUG-066	73	F	White	Not Hispanic or Latino	37
AUG-067	68	F	Black/African American	Not Hispanic or Latino	28.2
AUG-069	48	F	White	Not Hispanic or Latino	43.3
AUG-070	21	M	Asian	Not Hispanic or Latino	20.5
AUG-071	62	F	Black/African American	Not Hispanic or Latino	32.9
AUG-072	51	M	White	Not Hispanic or Latino	33
AUG-073	57	F	White	Not Hispanic or Latino	33.8
AUG-074	52	F	Black/African American	Not Hispanic or Latino	24.8
AUG-075	60	F	Black/African American	Not Hispanic or Latino	35.4
AUG-076	39	M	White	Not Hispanic or Latino	19.4
AUG-077	40	F	White	Not Hispanic or Latino	24.3
AUG-078	46	F	Asian	Not Hispanic or Latino	24.7
AUG-079	58	M	White	Not Hispanic or Latino	27.4
AUG-080	41	M	White	Not Hispanic or Latino	27.7
AUG-081	27	M	White	Not Hispanic or Latino	26.6
AUG-083	67	M	White	Not Hispanic or Latino	26.2
AUG-084	27	F	Black/African American	Not Hispanic or Latino	36.6
BMT-001	50	F	White	Not Hispanic or Latino	26.3
BMT-002	43	F	White	Not Hispanic or Latino	27.6
BMT-003	24	F	White	Not Hispanic or Latino	23.3
BMT-004	unknown	unknown	unknown	unknown	unknown
BMT-005	24	F	Black/African American	Not Hispanic or Latino	41.8
BMT-006	55	F	Black/African American	Not Hispanic or Latino	42.7
BMT-010	31	F	White	Not Hispanic or Latino	32.6
BMT-011	42	F	Asian	Not Hispanic or Latino	21.3
BMT-012	59	F	White	Not Hispanic or Latino	30.8
BMT-013	39	F	White	Not Hispanic or Latino	26.7
BMT-015	43	F	unknown	Not Hispanic or Latino	32.4
BMT-016	24	F	White	Not Hispanic or Latino	23
BMT-017	27	F	White	Not Hispanic or Latino	22.9
BMT-018	30	F	White	Not Hispanic or Latino	30.2
BMT-019	51	F	White	Not Hispanic or Latino	27.3
BMT-020	38	F	White	Not Hispanic or Latino	18.7
BMT-022	23	F	White	Not Hispanic or Latino	29.3
BMT-023	60	F	White	Not Hispanic or Latino	26.9
CTO-001	59	F	White	Not Hispanic or Latino	24.2
CTO-002	58	M	Multiple	Not Hispanic or Latino	24.3
CTO-003	59	F	Black/African American	Not Hispanic or Latino	31
CTO-007	58	F	Black/African American	Not Hispanic or Latino	27.3
CTO-009	35	F	White	Not Hispanic or Latino	23.1
CTO-011	48	F	White	Not Hispanic or Latino	23.7
CTO-013	47	F	Black/African American	Not Hispanic or Latino	83.5
CTR-001	32	F	White	Not Hispanic or Latino	37.4
CTR-002	38	M	White	Not Hispanic or Latino	30.8
CTR-003	50	F	White	Not Hispanic or Latino	31.5
CTR-004	26	F	White	Not Hispanic or Latino	27.8
CTR-005	39	M	White	Not Hispanic or Latino	31.9
CTR-006	24	M	White	Not Hispanic or Latino	29.1
CTR-007	29	M	White	Not Hispanic or Latino	28.7
CTR-008	20	F	White	Not Hispanic or Latino	23.3
CTR-009	23	M	White	Not Hispanic or Latino	24.7
CTR-010	33	F	White	Not Hispanic or Latino	25.3
CTR-011	18	M	Asian	Not Hispanic or Latino	28.4
CTR-012	69	F	White	Not Hispanic or Latino	34.1
CTR-013	18	F	Multiple	Not Hispanic or Latino	21.3
CTR-014	19	M	Asian	Not Hispanic or Latino	20
CTR-015	23	F	White	Hispanic or Latino	28.5
CTR-016	37	F	White	Not Hispanic or Latino	33.7
CTR-017	24	F	White	Not Hispanic or Latino	24.2
CTR-018	18	M	Asian	Not Hispanic or Latino	20.1
CTR-019	20	M	White	Not Hispanic or Latino	22.6
CTR-021	20	F	White	Not Hispanic or Latino	26.1
CTR-022	36	M	White	Not Hispanic or Latino	36.4
CTR-023	32	F	White	Not Hispanic or Latino	33.3
CTR-024	52	F	White	Not Hispanic or Latino	26.7
CTR-025	32	F	American Indian/Alaska Native	Hispanic or Latino	34.9
CTR-026	25	F	White	Not Hispanic or Latino	26.8
CTR-027	21	M	White	Not Hispanic or Latino	23.4
CTR-028	59	M	White	Not Hispanic or Latino	27.8
CTR-029	67	M	White	Not Hispanic or Latino	21.4
CTR-030	33	M	White	Not Hispanic or Latino	39.7
CTR-031	59	F	White	Not Hispanic or Latino	35.3
CTR-032	34	F	Black/African American	Not Hispanic or Latino	28.6
CTR-033	27	F	White	Not Hispanic or Latino	24.6
CTR-034	68	M	White	Not Hispanic or Latino	29.2
CTR-035	24	F	White	Not Hispanic or Latino	18.8
CTR-036	72	F	White	Not Hispanic or Latino	24.2
CTR-037	38	M	White	Not Hispanic or Latino	26.9
CTR-038	36	M	White	Not Hispanic or Latino	33.4
CTR-039	74	F	White	Not Hispanic or Latino	26.4
CTR-040	39	M	White	Not Hispanic or Latino	51.2
CTR-041	61	F	White	Not Hispanic or Latino	29.6
CTR-042	70	M	White	Not Hispanic or Latino	20.2
CTR-043	30	F	White	Not Hispanic or Latino	42.4
CTR-044	50	F	White	Not Hispanic or Latino	35.1
CTR-045	21	F	White	Not Hispanic or Latino	19.7
CTR-047	22	F	White	Not Hispanic or Latino	21.9
CTR-048	25	M	White	Not Hispanic or Latino	35.2
CTR-049	65	M	White	Not Hispanic or Latino	21.1
CTR-050	50	F	White	Not Hispanic or Latino	20.8
CTR-051	19	M	Asian	Not Hispanic or Latino	20.3
CTR-052	54	F	White	Not Hispanic or Latino	30
CTR-053	74	M	White	Not Hispanic or Latino	26
CTR-054	24	F	White	Not Hispanic or Latino	23.6
CTR-055	41	M	White	Not Hispanic or Latino	32.9
CTR-056	42	F	White	Hispanic or Latino	30.1
CTR-057	40	M	White	Not Hispanic or Latino	28.5
CTR-058	39	F	White	Not Hispanic or Latino	25.8
CTR-059	59	M	White	Not Hispanic or Latino	27.4
CTR-060	60	F	White	Not Hispanic or Latino	25.6
CTR-062	47	M	White	Not Hispanic or Latino	31
CTR-063	27	F	White	Not Hispanic or Latino	23.7
CTR-064	78	M	White	Not Hispanic or Latino	27.2
CTR-065	70	F	White	Not Hispanic or Latino	30.8
CTR-066	56	F	White	Not Hispanic or Latino	31.6
CTR-067	39	F	Multiple	Hispanic or Latino	28.4
CTR-068	70	M	White	Not Hispanic or Latino	29.8
CTR-069	46	F	White	Not Hispanic or Latino	25.1
CTR-070	29	F	White	Not Hispanic or Latino	25.3
CTR-071	34	F	White	Not Hispanic or Latino	22
CTR-072	73	F	White	Not Hispanic or Latino	31.2
CTR-073	75	F	White	Not Hispanic or Latino	43.7
CTR-074	52	F	White	Not Hispanic or Latino	33
CTR-075	79	M	White	Not Hispanic or Latino	33.3
CTR-076	36	F	White	Not Hispanic or Latino	22.1
CTR-077	78	F	White	Not Hispanic or Latino	26.8
CTR-078	48	F	White	Not Hispanic or Latino	23.5
CTR-079	45	F	Black/African American	Not Hispanic or Latino	32
CTR-080	20	F	Black/African American	Not Hispanic or Latino	37.2
CTR-081	65	F	White	Not Hispanic or Latino	20.2
CTR-082	32	F	White	Not Hispanic or Latino	33.9
CTR-083	64	F	White	Not Hispanic or Latino	36.9
CTR-084	21	M	White	Not Hispanic or Latino	24.3
CTR-085	20	F	White	Not Hispanic or Latino	20.7
CTR-086	29	F	White	Not Hispanic or Latino	27.1
CTR-088	19	F	White	Not Hispanic or Latino	19.1
CTR-089	77	M	White	Not Hispanic or Latino	23.6
CTR-090	70	F	White	Not Hispanic or Latino	32.9
CTR-091	31	M	White	Not Hispanic or Latino	23.6
CTR-092	20	F	White	Not Hispanic or Latino	22
CTR-093	73	M	White	Not Hispanic or Latino	29
CTR-094	73	F	White	Not Hispanic or Latino	29.1
CTR-095	31	F	White	Not Hispanic or Latino	26.8
CTR-097	57	F	White	Not Hispanic or Latino	21.6
CTR-098	55	F	White	Not Hispanic or Latino	20.5
CTR-099	53	M	White	Not Hispanic or Latino	30
CTR-101	60	M	White	Not Hispanic or Latino	30.7
CTR-103	45	F	Black/African American	Not Hispanic or Latino	24.6
CTR-104	18	F	White	Not Hispanic or Latino	22.5
CTR-105	50	M	Asian	Not Hispanic or Latino	21.9
CTR-106	43	M	White	Not Hispanic or Latino	31.6
CTR-107	51	M	Black/African American	Not Hispanic or Latino	25.3
CTR-108	60	F	White	Not Hispanic or Latino	23.4
CTR-109	56	F	White	Not Hispanic or Latino	29.4
CTR-110	58	F	Black/African American	Not Hispanic or Latino	23.8
CTR-111	51	F	White	Not Hispanic or Latino	20.1
CTR-112	19	F	White	Not Hispanic or Latino	22.5
CTR-113	49	M	White	Not Hispanic or Latino	28.9
CTR-114	46	F	White	Hispanic or Latino	27.2
CTR-115	44	M	White	Not Hispanic or Latino	52.5
CTR-116	66	F	White	Not Hispanic or Latino	27.5
CTR-117	77	M	White	Not Hispanic or Latino	30.8
CTR-118	72	M	White	Not Hispanic or Latino	23.5
CTR-119	49	M	White	Not Hispanic or Latino	26.2
CTR-120	83	F	White	Not Hispanic or Latino	23.8
CTR-121	45	F	White	Not Hispanic or Latino	47.3
CTR-122	47	M	White	Hispanic or Latino	31.3
CTR-123	62	F	White	Not Hispanic or Latino	31.8
CTR-124	64	M	White	Not Hispanic or Latino	25.5
CTR-125	29	F	White	Not Hispanic or Latino	18.4
CTR-126	40	F	White	Not Hispanic or Latino	25.1
CTR-127	43	F	White	Not Hispanic or Latino	21.1
CTR-128	70	F	White	Not Hispanic or Latino	28.2
CTR-129	61	M	White	Not Hispanic or Latino	28.9
CTR-130	49	M	White	Not Hispanic or Latino	29.1
CTR-131	24	M	White	Not Hispanic or Latino	22.9
CTR-132	64	F	White	Not Hispanic or Latino	22.8
CTR-133	71	F	White	Not Hispanic or Latino	22.4
CTR-134	53	F	White	Not Hispanic or Latino	23.6
CTR-135	49	F	White	Not Hispanic or Latino	26.3
CTR-136	57	M	White	Not Hispanic or Latino	33.3
CTR-137	46	F	White	Not Hispanic or Latino	42.4
CTR-138	69	F	White	Not Hispanic or Latino	30.7
CTR-139	68	F	White	Not Hispanic or Latino	41.4
CTR-140	20	F	Asian	Not Hispanic or Latino	28.2
CTR-141	34	F	Black/African American	Not Hispanic or Latino	22.3
CTR-142	63	F	White	Not Hispanic or Latino	27
CTR-143	39	F	White	Not Hispanic or Latino	19.4
CTR-144	69	M	White	Not Hispanic or Latino	29.9
CTR-145	66	M	White	Not Hispanic or Latino	28.7
CTR-146	62	F	White	Not Hispanic or Latino	22.5
CTR-147	38	F	White	Not Hispanic or Latino	18.1
CTR-148	50	F	White	Not Hispanic or Latino	26.2
CTR-149	43	F	White	Not Hispanic or Latino	35.2
CTR-150	68	F	White	Not Hispanic or Latino	28.4
CTR-151	66	F	White	Not Hispanic or Latino	29.1
CTR-152	51	M	White	Not Hispanic or Latino	25.5
CTR-153	73	M	White	Not Hispanic or Latino	23.8
CTR-154	70	F	White	Not Hispanic or Latino	26.7
CTR-155	25	F	White	Not Hispanic or Latino	18.8
CTR-156	63	F	White	Not Hispanic or Latino	23.8
CTR-157	65	M	Asian	Not Hispanic or Latino	24.1
CTR-158	70	F	White	Not Hispanic or Latino	33.9
CTR-159	58	F	White	Not Hispanic or Latino	39
CTR-160	49	F	Asian	Not Hispanic or Latino	24.5
CTR-161	18	M	White	Not Hispanic or Latino	29.7
CTR-162	20	F	White	Not Hispanic or Latino	24
CTR-163	19	M	White	Not Hispanic or Latino	17.6
CTR-164	20	F	White	Hispanic or Latino	28.5
CTR-165	22	F	White	Not Hispanic or Latino	30.1
CTR-166	49	F	White	Not Hispanic or Latino	22.8
CTR-167	66	M	White	Not Hispanic or Latino	25.5
CTR-168	67	M	White	Not Hispanic or Latino	38.4
CTR-169	63	F	White	Not Hispanic or Latino	31.4
CTR-170	52	F	White	Not Hispanic or Latino	23.7
CTR-171	20	F	Asian	Not Hispanic or Latino	22.8
CTR-172	57	F	White	Not Hispanic or Latino	26.2
CTR-173	59	F	White	Not Hispanic or Latino	27.1
CTR-174	43	M	White	Not Hispanic or Latino	24.3
CTR-175	27	F	White	Hispanic or Latino	25.7
CTR-176	18	F	White	Not Hispanic or Latino	22.1
CTR-177	49	F	White	Hispanic or Latino	24.3
CTR-178	51	F	White	Not Hispanic or Latino	24.2
CTR-179	65	F	White	Not Hispanic or Latino	23.4
CTR-180	50	F	White	Not Hispanic or Latino	28.1
CTR-181	31	F	White	Not Hispanic or Latino	30.8
CTR-182	70	F	White	Not Hispanic or Latino	41.6
CTR-183	45	F	White	Not Hispanic or Latino	21.6
CTR-184	65	M	White	Not Hispanic or Latino	27.5
CTR-185	64	F	White	Not Hispanic or Latino	22.7
CTR-186	27	M	Asian	Not Hispanic or Latino	24.8
CTR-187	58	M	White	Not Hispanic or Latino	39.3
CTR-188	18	F	White	Not Hispanic or Latino	24.8
CTR-189	60	F	White	Not Hispanic or Latino	21.4
CTR-190	19	F	Black/African American	Not Hispanic or Latino	20.5
CTR-191	24	F	White	Not Hispanic or Latino	23.7
CTR-192	33	F	White	Not Hispanic or Latino	38.1
CTR-193	60	F	White	Not Hispanic or Latino	39.5
CTR-194	28	M	White	Not Hispanic or Latino	47
CTR-195	50	F	White	Not Hispanic or Latino	23
CTR-196	73	M	White	Not Hispanic or Latino	29.5
CTR-197	66	F	White	Not Hispanic or Latino	24.4
CTR-199	32	M	White	Not Hispanic or Latino	25.7
CTR-200	72	F	White	Not Hispanic or Latino	44.8
CTR-201	65	F	White	Not Hispanic or Latino	23.5
CTR-202	60	F	White	Not Hispanic or Latino	22.9
CTR-203	80	M	White	Not Hispanic or Latino	24.2
CTR-204	24	M	White	Not Hispanic or Latino	21.9
CTR-206	79	M	White	Not Hispanic or Latino	31.1
CTR-207	75	M	White	Not Hispanic or Latino	35.2
CTR-208	74	F	White	Not Hispanic or Latino	31.9
CTR-209	74	M	White	Not Hispanic or Latino	35
CTR-210	27	F	Black/African American	Not Hispanic or Latino	30.2
CTR-211	19	F	White	Not Hispanic or Latino	28.4
CTR-212	58	F	White	Not Hispanic or Latino	32.7
CTR-213	57	M	White	Not Hispanic or Latino	30.2
CTR-214	56	F	White	Not Hispanic or Latino	27.9
CTR-215	74	M	White	Not Hispanic or Latino	32.9
CTR-216	69	F	White	Not Hispanic or Latino	27.8
CTR-217	23	F	White	Not Hispanic or Latino	25
CTR-218	60	M	White	Not Hispanic or Latino	42.7
CTR-219	40	M	White	Not Hispanic or Latino	24
CTR-220	57	F	White	Not Hispanic or Latino	22
CTR-221	53	M	White	Not Hispanic or Latino	28.8
CTR-222	50	M	White	Not Hispanic or Latino	26.8
CTR-223	55	F	White	Not Hispanic or Latino	27.2
CTR-224	34	F	Black/African American	Not Hispanic or Latino	41.9
CTR-227	22	M	White	Hispanic or Latino	23.2
CTR-229	73	F	Black/African American	Not Hispanic or Latino	33.3
CTR-230	22	F	Black/African American	Not Hispanic or Latino	25.1
CTR-231	48	M	White	Not Hispanic or Latino	27.4
CTR-232	28	M	White	Not Hispanic or Latino	24.1
CTR-233	60	F	White	Not Hispanic or Latino	22.3
CTR-235	34	F	White	Hispanic or Latino	29.3
CTR-236	43	M	White	Hispanic or Latino	34.6
CTR-237	75	F	White	Not Hispanic or Latino	31
CTR-238	61	M	White	Not Hispanic or Latino	36.8
CTR-239	22	M	White	Hispanic or Latino	21.2
CTR-240	45	M	Multiple	Not Hispanic or Latino	27.7
CTR-241	47	F	White	Not Hispanic or Latino	38.1
CTR-242	25	F	White	Hispanic or Latino	25
CTR-243	72	M	White	Not Hispanic or Latino	28.3
CTR-244	53	F	White	Not Hispanic or Latino	27.9
CTR-245	29	F	Asian	Not Hispanic or Latino	29.9
CTR-246	77	M	White	Not Hispanic or Latino	34.5
CTR-247	70	M	White	Not Hispanic or Latino	30.6
CTR-249	76	M	White	Not Hispanic or Latino	29
CTR-250	19	F	White	Not Hispanic or Latino	24.2
CTR-251	75	F	White	Not Hispanic or Latino	31.4
CTR-252	71	F	White	Not Hispanic or Latino	28.8
CTR-253	72	F	White	Not Hispanic or Latino	24.6
CTR-254	86	F	White	Not Hispanic or Latino	26.6
CTR-255	74	M	White	Not Hispanic or Latino	34.3
CTR-256	72	F	White	Not Hispanic or Latino	28
CTR-257	25	M	White	Hispanic or Latino	30.4
CTR-258	47	F	Black/African American	Not Hispanic or Latino	26.8
CTR-260	58	F	White	Not Hispanic or Latino	28.3
CTR-261	51	M	White	Not Hispanic or Latino	30.2
CTR-262	66	F	Black/African American	Not Hispanic or Latino	28
CTR-263	69	M	White	Not Hispanic or Latino	24.2
CTR-264	72	F	White	Not Hispanic or Latino	24.2
CTR-265	67	F	White	Not Hispanic or Latino	21.2
CTR-266	25	F	White	Not Hispanic or Latino	23.6
CTR-270	40	F	Black/African American	Not Hispanic or Latino	30
CTR-271	18	F	Black/African American	Not Hispanic or Latino	27.5
CTR-272	31	F	White	Not Hispanic or Latino	31.7
CTR-273	32	F	White	Not Hispanic or Latino	32.5
CTR-276	38	F	White	Not Hispanic or Latino	24.4
CTR-277	57	F	White	Not Hispanic or Latino	20.4
CTR-278	62	M	White	Not Hispanic or Latino	28
CTR-279	40	F	White	Not Hispanic or Latino	25.4
CTR-280	70	M	White	Not Hispanic or Latino	27.9
CTR-281	24	F	White	Not Hispanic or Latino	23.4
CTR-282	69	F	White	Not Hispanic or Latino	27.1
CTR-283	43	F	White	Not Hispanic or Latino	26.9
CTR-284	56	M	White	Not Hispanic or Latino	27.1
CTR-285	48	F	White	Not Hispanic or Latino	19.5
CTR-286	49	F	White	Not Hispanic or Latino	32.3
CTR-287	61	F	White	Not Hispanic or Latino	43.3
CTR-288	78	F	White	Not Hispanic or Latino	31.7
CTR-289	53	F	White	Not Hispanic or Latino	22.4
CTR-291	70	M	White	Not Hispanic or Latino	18.6
CTR-292	51	F	White	Not Hispanic or Latino	27.5
CTR-293	25	F	White	Hispanic or Latino	44.5
CTR-294	76	M	White	Not Hispanic or Latino	21.4
CTR-296	18	M	Black/African American	Not Hispanic or Latino	17.8
CTR-297	22	F	White	Not Hispanic or Latino	25.3
CTR-298	42	F	White	Not Hispanic or Latino	17.5
CTR-299	55	F	White	Not Hispanic or Latino	30
CTR-301	45	F	White	Not Hispanic or Latino	30.9
CTR-302	43	F	White	Not Hispanic or Latino	21.5
CTR-303	55	F	White	Not Hispanic or Latino	37.1
CTR-304	61	M	White	Not Hispanic or Latino	22
CTR-305	28	F	White	Hispanic or Latino	25.3
CTR-306	33	F	White	Not Hispanic or Latino	26.5
CTR-307	46	F	White	Not Hispanic or Latino	30.4
CTR-308	67	F	White	Not Hispanic or Latino	24.9
CTR-309	44	F	White	Not Hispanic or Latino	28.6
CTR-310	71	F	White	Not Hispanic or Latino	24.2
CTR-311	65	F	White	Not Hispanic or Latino	33.9
CTR-312	64	F	White	Not Hispanic or Latino	30.8
CTR-313	56	M	White	Hispanic or Latino	21.4
CTR-314	53	F	White	Hispanic or Latino	21.8
CTR-315	71	F	White	Not Hispanic or Latino	23.6
CTR-316	29	M	White	Not Hispanic or Latino	25.8
CTR-317	20	F	White	Not Hispanic or Latino	30.8
CTR-318	65	F	White	Not Hispanic or Latino	35.1
CTR-320	74	M	White	Not Hispanic or Latino	39.4
CTR-321	55	M	White	Not Hispanic or Latino	41.6
CTR-322	65	F	White	Not Hispanic or Latino	25.3
CTR-323	81	M	White	Not Hispanic or Latino	26.4
CTR-324	68	M	White	Hispanic or Latino	32.8
CTR-325	40	M	White	Hispanic or Latino	35.2
CTR-327	35	F	White	Hispanic or Latino	20.1
CTR-328	45	F	Black/African American	Not Hispanic or Latino	39.9
CTR-329	51	M	Black/African American	Not Hispanic or Latino	33.6
CTR-330	28	M	Multiple	Not Hispanic or Latino	26.5
CTR-331	29	F	Multiple	Hispanic or Latino	29.1
CTR-332	61	F	White	Hispanic or Latino	28.4
CTR-333	20	F	White	Hispanic or Latino	28.8
CTR-334	30	F	Black/African American	Not Hispanic or Latino	29.8
CTR-335	28	F	Black/African American	Not Hispanic or Latino	32.7
CTR-336	30	F	Black/African American	Not Hispanic or Latino	36.9
CTR-337	50	F	American Indian/Alaska Native	Not Hispanic or Latino	36.7
CTR-338	36	F	White	Hispanic or Latino	45.4
CTR-339	43	M	Multiple	Not Hispanic or Latino	27.4
CTR-340	23	F	White	Hispanic or Latino	39.8
CTR-341	28	F	Black/African American	Not Hispanic or Latino	36.7
CTR-342	23	M	Black/African American	Not Hispanic or Latino	24
CTR-343	38	F	Black/African American	Not Hispanic or Latino	51
CTR-345	44	F	Black/African American	Not Hispanic or Latino	23
CTR-346	30	F	Black/African American	Not Hispanic or Latino	26.3
CTR-347	46	F	Black/African American	Not Hispanic or Latino	23.2
CTR-349	30	M	Black/African American	Not Hispanic or Latino	38.8
CTR-350	29	F	Black/African American	Not Hispanic or Latino	35.9
CTR-351	27	M	American Indian/Alaska Native	Hispanic or Latino	29
CTR-352	29	F	Black/African American	Not Hispanic or Latino	28.3
CTR-353	37	M	Black/African American	Not Hispanic or Latino	22.7
CTR-355	28	M	Black/African American	Not Hispanic or Latino	21
CTR-356	23	F	American Indian/Alaska Native	Hispanic or Latino	28.2
CTR-357	32	F	White	Hispanic or Latino	27
CTR-358	20	F	White	Hispanic or Latino	25.8
CTR-359	19	F	White	Hispanic or Latino	25.6
CTR-360	26	M	White	Hispanic or Latino	40
CTR-361	27	F	White	Hispanic or Latino	22.3
CTR-362	64	F	Black/African American	Not Hispanic or Latino	28.3
CTR-364	30	F	White	Hispanic or Latino	26.4
CTR-365	70	F	Black/African American	Not Hispanic or Latino	34.4
CTR-366	32	M	White	Hispanic or Latino	24.6
CTR-367	76	F	Black/African American	Not Hispanic or Latino	31.6
CTR-370	24	F	Black/African American	Not Hispanic or Latino	27.1
CTR-371	21	M	White	Hispanic or Latino	36.4
CTR-372	20	F	White	Hispanic or Latino	31.9
CTR-374	20	M	White	Hispanic or Latino	23.4
CTR-375	20	F	Multiple	Not Hispanic or Latino	20.4
CTR-377	29	M	Black/African American	Not Hispanic or Latino	32
CVI-001	28	F	White	Not Hispanic or Latino	26
CVI-002	27	M	White	Not Hispanic or Latino	29.1
CVI-003	54	M	White	Not Hispanic or Latino	31.4
CVI-004	40	F	White	Not Hispanic or Latino	46.1
CVI-005	48	F	White	Not Hispanic or Latino	36.7
CVI-006	43	M	White	Not Hispanic or Latino	30.8
CVI-007	33	M	Asian	Not Hispanic or Latino	25.7
CVI-008	29	M	White	Not Hispanic or Latino	22.5
CVI-009	25	F	White	Not Hispanic or Latino	23.1
CVI-010	35	F	White	Hispanic or Latino	32.3
CVI-011	50	M	White	Not Hispanic or Latino	38.6
CVI-012	52	M	White	Not Hispanic or Latino	32.3
CVI-013	36	M	White	Not Hispanic or Latino	30.6
CVI-014	25	F	White	Hispanic or Latino	25.6
CVI-015	34	M	White	Not Hispanic or Latino	36
CVI-016	27	F	White	Not Hispanic or Latino	25.4
CVI-017	28	F	Asian	Hispanic or Latino	26.8
CVI-018	44	F	White	Not Hispanic or Latino	25.4
CVI-019	45	M	White	Not Hispanic or Latino	33.8
CVI-020	38	M	White	Not Hispanic or Latino	24.6
CVI-021	37	M	White	Not Hispanic or Latino	28.7
CVI-022	25	F	White	Hispanic or Latino	24.2
CVI-023	32	F	White	Hispanic or Latino	24.7
CVI-024	33	F	White	Hispanic or Latino	32.2
CVI-025	23	F	White	Not Hispanic or Latino	22.5
CVI-027	48	F	White	Not Hispanic or Latino	27.1
CVI-028	30	M	Asian	Not Hispanic or Latino	24.3
CVI-029	63	F	White	Not Hispanic or Latino	30.1
CVI-030	25	F	White	Not Hispanic or Latino	21.4
CVI-031	35	M	Multiple	Not Hispanic or Latino	25.7
CVI-032	24	M	White	Not Hispanic or Latino	22.8
CVI-033	51	F	White	Not Hispanic or Latino	25.1
CVI-034	26	F	White	Not Hispanic or Latino	29.2
CVI-035	56	F	White	Not Hispanic or Latino	31
CVI-036	27	M	White	Hispanic or Latino	26
CVI-037	37	M	Asian	Not Hispanic or Latino	35
CVI-038	39	F	White	Not Hispanic or Latino	47.9
CVI-039	48	F	White	Not Hispanic or Latino	37.8
CVI-040	27	M	White	Not Hispanic or Latino	25.2
CVI-041	50	F	White	Not Hispanic or Latino	42.8
CVI-042	61	M	White	Not Hispanic or Latino	45.4
CVI-043	30	F	White	Not Hispanic or Latino	28.9
CVI-044	37	F	White	Not Hispanic or Latino	24.1
CVI-045	63	M	White	Not Hispanic or Latino	31.8
CVI-047	59	F	White	Not Hispanic or Latino	23.9
CVI-048	50	F	White	Not Hispanic or Latino	27.3
CVI-049	58	M	White	Not Hispanic or Latino	27.8
CVI-050	39	M	White	Not Hispanic or Latino	31.9
CVI-051	18	F	White	Not Hispanic or Latino	20.7
CVI-052	26	F	White	Not Hispanic or Latino	23.2
CVI-053	18	M	Asian	Not Hispanic or Latino	23.4
CVI-054	46	F	White	Not Hispanic or Latino	23.9
CVI-055	27	F	White	Not Hispanic or Latino	25.7
CVI-056	53	M	White	Not Hispanic or Latino	26.5
CVI-057	39	F	White	Not Hispanic or Latino	20.8
CVI-058	19	F	White	Not Hispanic or Latino	21.6
CVI-059	18	F	White	Not Hispanic or Latino	20.1
CVI-060	18	F	White	Not Hispanic or Latino	32.8
CVI-061	31	F	White	Not Hispanic or Latino	32.4
CVI-062	26	F	White	Not Hispanic or Latino	24.9
CVI-063	24	F	White	Not Hispanic or Latino	45.4
CVI-064	30	F	White	Not Hispanic or Latino	26.2
CVI-065	62	F	White	Not Hispanic or Latino	26.5
CVI-066	56	F	White	Not Hispanic or Latino	25.1
CVI-067	20	F	White	Not Hispanic or Latino	19.5
CVI-068	49	F	White	Hispanic or Latino	49.5
CVI-069	22	M	White	Hispanic or Latino	43.6
CVI-070	26	non-binary	Asian	Not Hispanic or Latino	29.9
CVI-071	22	M	White	Hispanic or Latino	28.4
CVI-072	44	F	White	Not Hispanic or Latino	27.2
CVI-073	34	M	White	Hispanic or Latino	21
CVI-074	25	M	White	Not Hispanic or Latino	29.1
CVI-075	27	M	White	Not Hispanic or Latino	25.3
CVI-076	27	F	White	Not Hispanic or Latino	39
CVI-077	22	F	White	Not Hispanic or Latino	26.1
CVI-078	18	F	Asian	Not Hispanic or Latino	23.2
CVI-079	58	F	White	Not Hispanic or Latino	38.2
CVI-080	36	M	White	Not Hispanic or Latino	25.6
CVI-081	51	F	White	Not Hispanic or Latino	27.6
CVI-082	29	F	White	Not Hispanic or Latino	18.4
CVI-083	29	M	White	Not Hispanic or Latino	23
CVI-084	34	M	White	Not Hispanic or Latino	20.8
CVI-085	25	F	White	Not Hispanic or Latino	34.4
CVI-086	18	M	White	Not Hispanic or Latino	26.1
CVI-087	38	M	White	Not Hispanic or Latino	31.2
CVI-088	21	F	White	Hispanic or Latino	22.5
CVI-089	31	M	White	Not Hispanic or Latino	27.6
CVI-090	22	F	White	Not Hispanic or Latino	22.9
CVI-091	21	F	White	Not Hispanic or Latino	21.9
CVI-092	26	F	White	Not Hispanic or Latino	25.7
CVI-093	61	F	White	Not Hispanic or Latino	42.3
CVI-094	26	F	Asian	Not Hispanic or Latino	24.1
CVI-095	26	M	Asian	Not Hispanic or Latino	23
CVI-096	50	M	White	Not Hispanic or Latino	24.3
CVI-097	49	F	White	Not Hispanic or Latino	41.8
CVI-098	26	M	White	Not Hispanic or Latino	24.4
CVI-099	25	M	White	Not Hispanic or Latino	23.2
CVI-100	28	M	Asian	Not Hispanic or Latino	24.7
CVI-101	38	M	White	Not Hispanic or Latino	27.7
CVI-102	40	M	White	Not Hispanic or Latino	36.1
CVI-103	22	F	White	Not Hispanic or Latino	25
CVI-104	29	F	White	Not Hispanic or Latino	24
CVI-105	39	M	White	Not Hispanic or Latino	38.9
CVI-106	46	M	White	Not Hispanic or Latino	31.8
CVI-107	57	F	White	Not Hispanic or Latino	25.2
CVI-108	35	M	White	Not Hispanic or Latino	29.8
CVI-109	28	M	White	Not Hispanic or Latino	26.9
CVI-110	26	F	White	Not Hispanic or Latino	22.9
CVI-111	30	F	White	Hispanic or Latino	21.1
CVI-112	34	F	White	Not Hispanic or Latino	23.2
CVI-113	23	F	White	Not Hispanic or Latino	24.2
CVI-114	43	F	White	Not Hispanic or Latino	19.9
CVI-115	40	F	White	Not Hispanic or Latino	26
CVI-116	49	F	Black/African American	Not Hispanic or Latino	32
CVI-117	35	M	White	Not Hispanic or Latino	32.3
CVI-118	32	F	White	Not Hispanic or Latino	25.4
CVI-119	44	F	White	Not Hispanic or Latino	49.2
CVI-120	39	F	White	Not Hispanic or Latino	40.2
CVI-122	35	M	White	Not Hispanic or Latino	28.1
CVI-123	51	M	White	Not Hispanic or Latino	23.4
CVI-124	59	F	White	Hispanic or Latino	30.4
CVI-125	32	M	White	Not Hispanic or Latino	26
CVI-126	43	M	White	Hispanic or Latino	44
CVI-127	22	M	White	Not Hispanic or Latino	23.9
CVI-128	65	F	White	Not Hispanic or Latino	28.8
CVI-129	27	F	White	Not Hispanic or Latino	25.3
CVI-130	68	F	White	Not Hispanic or Latino	21.3
CVI-131	20	M	White	Not Hispanic or Latino	21.1
CVI-132	56	M	White	Not Hispanic or Latino	32.7
CVI-133	45	F	White	Not Hispanic or Latino	24.8
CVI-134	23	M	White	Not Hispanic or Latino	36
CVI-135	36	F	Multiple	Not Hispanic or Latino	32.3
CVI-136	36	F	White	Not Hispanic or Latino	25.1
CVI-137	49	F	White	Not Hispanic or Latino	36.1
CVI-138	57	M	White	Not Hispanic or Latino	29
CVI-139	22	F	White	Not Hispanic or Latino	22.7
CVI-140	27	M	Multiple	Not Hispanic or Latino	21.6
CVI-141	37	F	White	Not Hispanic or Latino	30.2
CVI-142	35	M	White	Hispanic or Latino	33.2
CVI-143	49	F	White	Not Hispanic or Latino	30.2
CVI-144	34	F	White	Not Hispanic or Latino	25.7
CVI-145	29	M	White	Not Hispanic or Latino	25
CVI-146	31	M	White	Not Hispanic or Latino	24.5
CVI-147	31	M	Black/African American	Not Hispanic or Latino	26.5
CVI-148	37	F	White	Not Hispanic or Latino	19.1
CVI-149	40	M	White	Not Hispanic or Latino	26.7
CVI-150	50	F	White	Not Hispanic or Latino
CVI-151	27	F	White	Not Hispanic or Latino	32.2
CVI-152	24	F	White	Not Hispanic or Latino	30.9
CVI-153	30	M	White	Not Hispanic or Latino	25
CVI-154	27	F	White	Hispanic or Latino	22.9
CVI-155	37	F	White	Not Hispanic or Latino	25.3
CVI-156	30	M	White	Not Hispanic or Latino	31.1
CVI-157	29	F	White	Not Hispanic or Latino	25.7
CVI-158	26	F	White	Hispanic or Latino	21.8
CVI-159	57	F	White	Not Hispanic or Latino	40.2
CVI-160	37	F	White	Hispanic or Latino	29.5
CVI-164	47	F	White	Not Hispanic or Latino	32.7
CVI-166	61	M	White	Not Hispanic or Latino	95.5
CVI-168	38	F	White	Not Hispanic or Latino	21.8
CVI-173	50	M	White	Not Hispanic or Latino	38.9
CVI-175	41	F	White	Not Hispanic or Latino	29.1
CVI-177	20	F	White	Not Hispanic or Latino	26
CVI-182	28	M	White	Not Hispanic or Latino	23.3
CVI-183	19	F	White	Not Hispanic or Latino	24.6
CVI-184	29	F	White	Not Hispanic or Latino	23.7
CVI-189	37	F	White	Not Hispanic or Latino	43.3
CVI-190	24	F	White	Not Hispanic or Latino	23
CVI-191	48	F	White	Not Hispanic or Latino	23.2
CVI-195	56	F	White	Not Hispanic or Latino	24.6
CVI-197	41	F	White	Not Hispanic or Latino	53.1
CVI-198	47	F	White	Not Hispanic or Latino	50.7
CVI-199	22	F	White	Not Hispanic or Latino	20.7
CVI-202	33	F	White	Not Hispanic or Latino	30.7
CVI-204	36	M	White	Not Hispanic or Latino	26.3
CVI-205	23	M	White	Not Hispanic or Latino	27
CVI-207	32	M	White	Not Hispanic or Latino	29.1
CVI-208	61	F	White	Not Hispanic or Latino	26.5
CVI-211	39	F	White	Not Hispanic or Latino	28.3
CVI-212	33	F	White	Not Hispanic or Latino	27.1
CVI-216	47	F	White	Not Hispanic or Latino	28
CVI-217	46	M	White	Not Hispanic or Latino	24.2
CVI-219	36	F	White	Not Hispanic or Latino	28.1
CVI-222	27	M	White	Not Hispanic or Latino	23.3
CVI-224	34	F	Asian	Not Hispanic or Latino	26.1
CVI-226	22	F	White	Not Hispanic or Latino	21.9
CVI-227	20	M	White	Not Hispanic or Latino	25.1
CVI-229	23	F	White	Not Hispanic or Latino	21
CVI-230	39	F	White	Not Hispanic or Latino	38.8
CVI-231	58	F	White	Not Hispanic or Latino	22.7
CVI-232	54	M	White	Not Hispanic or Latino	24
CVI-234	62	F	White	Not Hispanic or Latino	23.4
CVI-236	23	F	White	Not Hispanic or Latino	47.9
CVI-239	49	M	White	Not Hispanic or Latino	40.1
CVI-240	66	F	White	Not Hispanic or Latino	32.3
CVI-241	32	F	White	Not Hispanic or Latino	22.3
CVI-242	38	F	White	Hispanic or Latino	21.2
CVI-245	26	F	White	Not Hispanic or Latino	30.6
CVI-247	29	M	White	Not Hispanic or Latino	48.8
CVI-250	66	F	Black/African American	Not Hispanic or Latino	28.3
CVI-253	47	F	White	Not Hispanic or Latino	29.2
CVI-255	69	F	White	Not Hispanic or Latino	29.1
CVI-256	81	F	White	Not Hispanic or Latino	21
CVI-257	67	F	White	Not Hispanic or Latino	33.2
CVI-260	49	F	White	Not Hispanic or Latino	32.8
CVI-262	75	F	White	Not Hispanic or Latino	24.3
CVI-264	59	M	White	Not Hispanic or Latino	27.4
CVI-265	50	F	White	Not Hispanic or Latino	34.5
CVI-266	51	F	Asian	Not Hispanic or Latino	23.4
CVI-267	72	M	White	Not Hispanic or Latino	31.5
CVI-268	49	F	White	Not Hispanic or Latino	39.9
CVI-272	28	M	White	Hispanic or Latino	27.6
CVI-274	23	F	White	Not Hispanic or Latino	26.5
CVI-275	23	F	White	Not Hispanic or Latino	25.8
CVI-276	32	F	Asian	Not Hispanic or Latino	25.3
CVI-279	72	F	White	Not Hispanic or Latino	26.1
CVI-280	61	F	Black/African American	Not Hispanic or Latino	39.1
CVI-281	66	F	White	Not Hispanic or Latino	29.3
CVI-282	22	F	White	Not Hispanic or Latino	43.5
CVI-283	32	M	White	Not Hispanic or Latino	38.9
CVI-285	50	F	White	Not Hispanic or Latino	23.7
CVI-287	54	M	White	Not Hispanic or Latino	31.3
CVI-289	68	F	White	Not Hispanic or Latino	30.4
CVI-291	51	M	White	Not Hispanic or Latino	29
CVI-292	50	F	White	Not Hispanic or Latino	38.2
CVI-295	56	M	White	Not Hispanic or Latino	30.3
CVI-299	55	F	White	Not Hispanic or Latino	31.2
CVI-300	64	F	White	Not Hispanic or Latino	25.4
CVI-302	36	M	White	Not Hispanic or Latino	30
CVI-304	59	M	White	Not Hispanic or Latino	25.8
CVI-307	46	F	White	Not Hispanic or Latino	33.5
CVI-308	28	F	White	Not Hispanic or Latino
CVI-309	38	M	White	Not Hispanic or Latino	26.2
CVI-310	33	F	White	Not Hispanic or Latino	39.5
CVI-311	35	M	White	Not Hispanic or Latino	23.3
CVI-312	76	F	White	Not Hispanic or Latino	31.2
CVI-313	40	F	White	Not Hispanic or Latino	45.3
CVI-314	65	F	White	Not Hispanic or Latino	26.9
CVI-315	37	F	White	Not Hispanic or Latino	23.5
CVI-316	39	M	White	Not Hispanic or Latino	25.9
CVI-320	25	F	White	Not Hispanic or Latino	20.6
CVI-321	57	F	White	Not Hispanic or Latino	30.7
CVI-322	26	F	White	Not Hispanic or Latino	19.8
CVI-323	28	M	White	Hispanic or Latino	26
CVI-324	70	M	White	Not Hispanic or Latino	25.5
CVI-325	66	F	White	Not Hispanic or Latino	24.7
CVI-329	49	M	White	Not Hispanic or Latino	36
CVI-330	43	F	White	Not Hispanic or Latino	28.2
CVI-331	82	M	White	Not Hispanic or Latino	30.5
CVI-334	65	M	White	Not Hispanic or Latino	31.2
CVI-335	83	M	White	Not Hispanic or Latino	24.5
CVI-336	62	F	White	Not Hispanic or Latino	25
CVI-337	29	F	White	Not Hispanic or Latino	33.4
CVI-339	38	F	White	Not Hispanic or Latino	19.7
CVI-340	69	F	White	Not Hispanic or Latino	22.5
CVI-341	67	F	White	Not Hispanic or Latino	20.5
CVI-342	66	F	White	Not Hispanic or Latino	29.4
CVI-343	71	M	White	Not Hispanic or Latino	32.4
CVI-346	46	F	White	Not Hispanic or Latino	29.5
CVI-347	58	M	White	Not Hispanic or Latino	31.2
CVI-349	46	M	White	Not Hispanic or Latino	30.8
CVI-350	48	F	White	Not Hispanic or Latino	25.6
CVI-351	71	F	White	Not Hispanic or Latino	32
CVI-353	75	F	White	Not Hispanic or Latino	25.2
CVI-356	42	M	White	Not Hispanic or Latino	29.2
CVI-357	67	M	White	Not Hispanic or Latino	30.4
CVI-358	40	M	White	Hispanic or Latino	31.2
CVI-359	68	M	White	Not Hispanic or Latino	19.7
CVI-362	73	F	White	Not Hispanic or Latino	26.5
CVI-363	73	F	White	Not Hispanic or Latino	20.6
CVI-364	77	M	White	Not Hispanic or Latino	27.4
CVI-365	73	F	White	Not Hispanic or Latino	23.1
CVI-366	22	F	Black/African American	Not Hispanic or Latino	24.1
CVI-367	61	F	White	Not Hispanic or Latino	21
CVI-368	51	F	White	Not Hispanic or Latino	34.6
CVI-369	82	F	White	Not Hispanic or Latino	26
CVI-370	83	M	White	Not Hispanic or Latino	29.3
CVI-371	70	F	White	Not Hispanic or Latino	23.6
CVI-372	70	M	White	Not Hispanic or Latino	25.1
CVI-373	65	F	White	Not Hispanic or Latino	33.4
CVI-374	81	F	White	Not Hispanic or Latino	24.6
CVI-375	20	F	White	Hispanic or Latino	19.3
CVI-376	64	F	White	Not Hispanic or Latino	44.2
CVI-378	79	F	White	Not Hispanic or Latino	22.7
CVI-386	22	M	White	Hispanic or Latino	28.3
CVI-388	54	F	Black/African American	Not Hispanic or Latino	28.1
CVI-390	28	F	Native Hawaiian/Pacific Islander	Not Hispanic or Latino	29.3
CVI-394	56	F	White	Not Hispanic or Latino	32.9
CVI-398	21	F	White	Not Hispanic or Latino	28.4
CVI-399	49	F	White	Not Hispanic or Latino	22.4
CVI-401	18	F	White	Not Hispanic or Latino	27.9
CVI-410	24	F	Multiple	Not Hispanic or Latino	21
CVI-416	25	F	White	Not Hispanic or Latino	22.7
CVI-421	80	M	White	Not Hispanic or Latino	30.3
CVI-424	54	F	White	Not Hispanic or Latino	41.3
CVI-429	28	F	White	Not Hispanic or Latino	31.4
CVI-439	21	F	White	Not Hispanic or Latino	22.4
CVI-442	52	F	White	Not Hispanic or Latino	24.3
CVI-444	52	M	White	Not Hispanic or Latino	29.5
CVI-448	80	M	White	Not Hispanic or Latino	28.7
CVI-453	53	F	White	Not Hispanic or Latino	41.7
CVI-454	52	F	White	Not Hispanic or Latino
CVI-455	25	F	White	Not Hispanic or Latino	28.8
CVI-468	21	F	White	Not Hispanic or Latino	21.8
CVI-469	53	M	White	Not Hispanic or Latino	35.6
CVI-470	32	F	White	Not Hispanic or Latino	37.7
CVI-479	60	F	White	Not Hispanic or Latino	22.2
CVI-480	72	F	White	Not Hispanic or Latino	31.6
CVI-493	58	F	White	Not Hispanic or Latino	27.6
CVI-494	28	F	White	Not Hispanic or Latino	38.1
CVI-498	59	F	White	Not Hispanic or Latino	27.5
CVI-499	75	M	White	Not Hispanic or Latino	25
CVI-503	49	F	White	Not Hispanic or Latino	29
CVI-507	24	M	White	Not Hispanic or Latino	27.6
CVI-508	71	M	White	Not Hispanic or Latino	23.2
CVI-509	22	M	White	Not Hispanic or Latino	41.4
CVI-513	55	M	White	Not Hispanic or Latino	34.7
CVI-518	73	F	White	Not Hispanic or Latino	26.2
CVI-520	43	M	American Indian/Alaska Native	Not Hispanic or Latino	37.7
CVI-524	45	F	White	Not Hispanic or Latino	28.3
CVI-525	47	M	White	Not Hispanic or Latino	26.4
CVI-527	34	F	White	Not Hispanic or Latino	40.2
CVI-529	29	F	White	Not Hispanic or Latino	20.4
CVI-530	42	F	White	Not Hispanic or Latino	28.9
CVI-533	64	M	White	Not Hispanic or Latino	28
CVI-535	57	F	White	Not Hispanic or Latino	26.4
CVI-542	21	F	White	Hispanic or Latino	23.1
CVI-544	73	M	White	Not Hispanic or Latino	42.8
CVI-547	77	F	White	Not Hispanic or Latino	32.8
CVI-550	34	F	White	Not Hispanic or Latino	35
CVI-555	60	F	White	Not Hispanic or Latino	21.7
CVI-557	48	M	White	Not Hispanic or Latino	35.3
CVI-559	81	F	White	Not Hispanic or Latino	24.2
CVI-563	52	M	White	Not Hispanic or Latino	36.3
CVI-564	49	F	White	Not Hispanic or Latino	23.9
CVI-566	50	M	White	Not Hispanic or Latino	28.4
CVI-569	50	F	White	Not Hispanic or Latino	38.1
CVI-573	71	M	White	Not Hispanic or Latino	30.1
CVI-576	73	F	White	Not Hispanic or Latino	23.6
CVI-577	74	M	White	Not Hispanic or Latino	23.8
CVI-580	20	F	Black/African American	Not Hispanic or Latino	27.4
CVI-583	73	F	White	Not Hispanic or Latino	24
CVI-586	78	M	White	Not Hispanic or Latino	30.8
CVI-590	24	M	White	Not Hispanic or Latino	22.3
CVI-593	53	F	White	Not Hispanic or Latino	32.7
CVI-595	78	F	White	Not Hispanic or Latino	21.1
CVI-596	64	F	White	Not Hispanic or Latino	23.6
CVI-597	65	M	White	Not Hispanic or Latino	25.4
CVI-602	28	F	White	Not Hispanic or Latino	40.6
CVI-604	73	M	White	Not Hispanic or Latino	25.5
CVI-605	74	F	White	Not Hispanic or Latino	35
CVI-606	75	M	White	Not Hispanic or Latino	32
CVI-608	72	F	White	Not Hispanic or Latino	30.2
CVI-609	24	F	White	Hispanic or Latino	21.3
CVI-617	43	M	White	Not Hispanic or Latino	36.9
CVI-625	39	F	White	Not Hispanic or Latino	22.1
CVI-627	48	M	White	Not Hispanic or Latino	31.3
CVI-629	19	M	White	Not Hispanic or Latino	21.1
CVI-634	48	F	White	Not Hispanic or Latino	32.2
CVI-636	83	F	White	Not Hispanic or Latino	30.7
CVI-643	59	F	White	Not Hispanic or Latino	29.1
CVI-644	72	M	White	Not Hispanic or Latino	22
CVI-645	73	F	White	Not Hispanic or Latino	28.1
CVI-663	26	F	White	Not Hispanic or Latino
CVI-665	34	F	White	Not Hispanic or Latino
CVI-673	40	F	White	Not Hispanic or Latino	21
CVI-674	26	M	White	Not Hispanic or Latino	29.7
CVI-679	74	F	White	Not Hispanic or Latino	20.8
CVI-680	24	F	White	Not Hispanic or Latino	37
CVI-683	24	F	Asian	Not Hispanic or Latino	21.4
CVI-686	24	M	Multiple	Not Hispanic or Latino	28.2
CVI-701	20	F	White	Hispanic or Latino	26.5
CVI-719	27	M	Asian	Not Hispanic or Latino	33
CVI-728	27	F	White	Not Hispanic or Latino	25.8
CVI-732	83	M	White	Not Hispanic or Latino
CVI-752	24	F	White	Not Hispanic or Latino	26.2
CVI-765	40	M	Asian	Not Hispanic or Latino	22.3
CVI-793	69	F	White	Not Hispanic or Latino	25.5
CVI-809	64	F	White	Not Hispanic or Latino	29
DCG-001	66	F	White	Not Hispanic or Latino	27.5
DCG-002	58	F	White	Hispanic or Latino	22.5
DCG-003	25	M	Asian	Not Hispanic or Latino	21.6
DCG-004	33	M	White	Not Hispanic or Latino	23.9
DCG-005	24	F	Asian	Not Hispanic or Latino	24.8
DCG-006	27	M	White	Not Hispanic or Latino	26
DCG-007	27	F	Asian	Not Hispanic or Latino	20.5
DCG-008	43	F	White	Not Hispanic or Latino	22.8
DCG-009	26	F	White	Not Hispanic or Latino	20.8
DCG-010	24	F	White	Not Hispanic or Latino	22.9
DCG-034	43	F	Black/African American	Not Hispanic or Latino	25
DCG-036	39	M	Asian	Not Hispanic or Latino	24.5
DCG-044	27	F	Asian	Not Hispanic or Latino	21
DCG-048	23	F	White	Not Hispanic or Latino	20.2
DCG-060	56	M	White	Not Hispanic or Latino	36
DCG-069	27	M	Asian	Not Hispanic or Latino	24.8
DCG-075	26	F	Black/African American	Not Hispanic or Latino	24
DCG-081	25	M	Asian	Not Hispanic or Latino	26.7
DCG-084	27	M	White	Not Hispanic or Latino	28.4
DCG-092	26	M	White	Not Hispanic or Latino	25.1
DCG-106	23	F	Asian	Not Hispanic or Latino	25.8
DCG-107	43	F	White	Not Hispanic or Latino	40.1
DCG-110	24	F	White	Hispanic or Latino	19.5
DCG-121	48	F	White	Not Hispanic or Latino	29.7
DCG-124	52	F	White	Not Hispanic or Latino	41.3
DCG-127	66	M	Black/African American	Not Hispanic or Latino	36.5
DCG-129	23	F	Asian	Not Hispanic or Latino	20.6
DCG-131	24	F	White	Not Hispanic or Latino	19.7
DCG-135	25	F	White	Not Hispanic or Latino	25.8
DCG-144	46	F	White	Not Hispanic or Latino	23.7
DCG-146	26	M	White	Hispanic or Latino	24.3
DCG-148	23	F	White	Not Hispanic or Latino	25.3
DCG-150	22	F	White	Not Hispanic or Latino	23.1
DCG-152	28	F	White	Hispanic or Latino	28
DCG-166	64	M	White	Not Hispanic or Latino	20.1
DCG-173	57	F	White	Not Hispanic or Latino	31.6
DCG-176	34	F	White	Not Hispanic or Latino	21.7
DCG-181	23	M	Multiple	Not Hispanic or Latino	22.4
DCG-187	24	F	White	Not Hispanic or Latino	21.7
IHC-040	50	M	Black/African American	Not Hispanic or Latino	35.6
MHC-004	24	F	White	Not Hispanic or Latino	23.1
MHC-006	39	F	White	Hispanic or Latino	30.7
MHC-007	60	M	Black/African American	Not Hispanic or Latino	38.9
MHC-010	54	F	White	Not Hispanic or Latino	21.6
MHC-015	69	F	White	Not Hispanic or Latino	24.3
MHC-016	22	F	White	Not Hispanic or Latino	22.5
MHC-018	48	M	Black/African American	Not Hispanic or Latino	42
MHC-022	22	F	White	Not Hispanic or Latino	24
MHC-023	74	F	White	Not Hispanic or Latino	23.5
MHC-024	57	F	White	Not Hispanic or Latino	27.8
MHC-030	78	M	White	Not Hispanic or Latino	30.1
MHC-038	73	F	White	Not Hispanic or Latino	24.2
MHC-042	68	F	White	Not Hispanic or Latino	29.3
MHC-053	49	M	White	Not Hispanic or Latino	28.2
MHC-054	59	F	White	Not Hispanic or Latino	29.6
MHC-055	66	F	White	Not Hispanic or Latino	27.4
MHC-071	88	F	White	Not Hispanic or Latino	22.2
MHC-076	72	F	White	Not Hispanic or Latino	25.7
MHC-080	82	F	White	Not Hispanic or Latino	30.6
MHC-081	83	M	White	Not Hispanic or Latino	24.2
MHC-084	49	M	White	Not Hispanic or Latino	26.4
MHC-087	22	M	White	Not Hispanic or Latino	28
P-002	44	M	White	Not Hispanic or Latino	26.5
P-006	62	F	White	Not Hispanic or Latino	37.5
P-007	47	M	White	Not Hispanic or Latino	39.7
P-008	29	M	White	Not Hispanic or Latino	26.5
P-009	44	F	White	Not Hispanic or Latino	24.2
P-010	62	F	White	Not Hispanic or Latino	31.4
P-014	63	F	White	Not Hispanic or Latino	22.1
P-015	52	F	White	Not Hispanic or Latino	24.9
P-016	33	M	Multiple	Not Hispanic or Latino	31.4
P-018	50	F	White	Not Hispanic or Latino	25.9
P-019	41	F	White	Not Hispanic or Latino	35.5
P-022	49	F	White	Not Hispanic or Latino	29.3
P-024	39	F	White	Not Hispanic or Latino	49.9
P-025	38	F	White	Not Hispanic or Latino	32.1
P-029	51	F	White	Not Hispanic or Latino	28.1
P-030	61	M	White	Not Hispanic or Latino	35.6
P-031	28	F	White	Not Hispanic or Latino	29.8
P-032	45	F	White	Not Hispanic or Latino	26.3
P-035	50	M	White	Not Hispanic or Latino	32.2
P-038	31	F	White	Not Hispanic or Latino	25.9
P-040	29	F	White	Not Hispanic or Latino	39.1
P-041	49	F	White	Not Hispanic or Latino	22.2
P-042	30	M	White	Not Hispanic or Latino	29.4
P-044	39	F	White	Not Hispanic or Latino	24.2
P-045	65	F	White	Not Hispanic or Latino	28.9
P-047	39	M	White	Not Hispanic or Latino	28.3
P-049	34	F	White	Not Hispanic or Latino	28.2
P-051	22	M	White	Not Hispanic or Latino	25
P-052	49	F	White	Not Hispanic or Latino	42.1
P-053	46	F	White	Not Hispanic or Latino	36.4
P-055	26	F	American Indian/Alaska Native	Not Hispanic or Latino	23.1
P-056	61	F	White	Not Hispanic or Latino	44.4
P-058	67	F	White	Not Hispanic or Latino	31.9
P-059	50	F	White	Not Hispanic or Latino	23.2
P-061	24	F	White	Not Hispanic or Latino	25.9
P-064	45	F	White	Not Hispanic or Latino	21.9
P-067	45	F	White	Not Hispanic or Latino	30.8
P-068	35	F	White	Not Hispanic or Latino	30.3
P-069	47	F	White	Not Hispanic or Latino	26.9
P-070	62	F	White	Not Hispanic or Latino	27.7
P-071	38	F	White	Not Hispanic or Latino	32.6
P-076	33	F	White	Hispanic or Latino	33.6
P-080	34	M	White	Not Hispanic or Latino	40.5
P-081	46	F	White	Not Hispanic or Latino	27.7
P-082	49	F	White	Not Hispanic or Latino	20.4
P-083	41	F	White	Not Hispanic or Latino	32.4
P-087	42	F	White	Not Hispanic or Latino	29.3
P-090	40	F	White	Not Hispanic or Latino	26
P-091	47	M	White	Not Hispanic or Latino	44.4
P-095	48	M	White	Not Hispanic or Latino	36
P-097	43	M	White	Not Hispanic or Latino	27.2
P-098	41	F	White	Not Hispanic or Latino	23.3
P-099	61	F	White	Not Hispanic or Latino	25.1
P-100	41	F	White	Not Hispanic or Latino	27.7
P-101	57	F	White	Not Hispanic or Latino	21.2
P-102	59	M	White	Not Hispanic or Latino	28.5
P-106	42	F	White	Not Hispanic or Latino	27.5
P-111	60	F	White	Not Hispanic or Latino	30.3
P-112	36	F	White	Not Hispanic or Latino	37.5
P-113	59	F	White	Not Hispanic or Latino	29.9
P-119	32	M	White	Not Hispanic or Latino	23.2
P-121	57	M	White	Not Hispanic or Latino	22.7
P-124	52	F	White	Not Hispanic or Latino	34.5
P-125	42	F	White	Not Hispanic or Latino	22.9
P-126	39	F	White	Not Hispanic or Latino	22.9
P-128	62	F	White	Not Hispanic or Latino	25.7
P-132	36	F	White	Not Hispanic or Latino	21.4
P-134	69	M	White	Not Hispanic or Latino	25.9
P-136	39	M	White	Not Hispanic or Latino	21.1
P-139	40	F	White	Not Hispanic or Latino	43.5
P-140	42	F	White	Not Hispanic or Latino	36.5
P-141	39	F	White	Not Hispanic or Latino	30.3
P-142	44	F	White	Not Hispanic or Latino	24.1
P-144	35	F	White	Not Hispanic or Latino	25.5
P-148	46	M	White	Not Hispanic or Latino	21.4
P-149	38	F	White	Not Hispanic or Latino	24.8
P-150	25	F	White	Not Hispanic or Latino	20.4
P-153	32	F	White	Not Hispanic or Latino	24.1
P-156	44	F	White	Not Hispanic or Latino	28.4
P-159	45	F	White	Not Hispanic or Latino	27.8
P-161	35	M	White	Not Hispanic or Latino	25.1
P-168	43	F	Black/African American	Not Hispanic or Latino	35.6
P-170	34	M	White	Not Hispanic or Latino	39.5
P-172	40	F	Black/African American	Not Hispanic or Latino	36.3
P-174	24	F	White	Not Hispanic or Latino	26.6
P-178	25	M	White	Not Hispanic or Latino	25.9
P-180	45	F	White	Not Hispanic or Latino	35
P-181	59	F	White	Not Hispanic or Latino	46.7
P-184	28	F	White	Not Hispanic or Latino	24.6
P-187	29	F	White	Not Hispanic or Latino	30
P-190	61	F	White	Not Hispanic or Latino	20.1
P-195	49	F	White	Hispanic or Latino	31.8
P-196	49	F	White	Hispanic or Latino	24.1
P-197	60	F	White	Not Hispanic or Latino	26.1
P-199	54	F	Black/African American	Not Hispanic or Latino	44.2
P-200	31	F	White	Not Hispanic or Latino	31.2
P-202	42	F	White	Not Hispanic or Latino	26.7
P-207	50	F	White	Not Hispanic or Latino	32.4
P-211	67	F	White	Not Hispanic or Latino	34.7
P-212	62	F	Black/African American	Not Hispanic or Latino	31.5
P-219	29	F	Asian	Not Hispanic or Latino	29.6
P-221	35	F	White	Not Hispanic or Latino	27.2
P-223	46	F	White	Not Hispanic or Latino	35.7
P-227	63	F	White	Not Hispanic or Latino	31.6
P-231	55	F	White	Not Hispanic or Latino	30.8
P-235	56	M	Black/African American	Not Hispanic or Latino	21.2
P-238	39	F	White	Not Hispanic or Latino	24.8
P-240	44	M	White	Not Hispanic or Latino	36.6
P-245	76	F	White	Not Hispanic or Latino
P-251	58	F	Black/African American	Not Hispanic or Latino	22.5
P-258	57	M	White	Not Hispanic or Latino	27.6
P-259	72	M	White	Not Hispanic or Latino	29.2
P-260	45	F	White	Not Hispanic or Latino	27.4
P-263	58	F	Black/African American	Not Hispanic or Latino	26.8
P-265	79	F	White	Not Hispanic or Latino	23
P-268	24	F	White	Not Hispanic or Latino	23.2
P-269	59	M	White	Not Hispanic or Latino	25.3
P-271	66	F	White	Not Hispanic or Latino	26.8
P-275	29	F	Black/African American	Not Hispanic or Latino	19.4
P-276	64	F	White	Not Hispanic or Latino	21.5
P-277	72	F	White	Not Hispanic or Latino	19.8
P-281	26	F	White	Not Hispanic or Latino	34.4
P-282	49	F	White	Not Hispanic or Latino	25.8
P-285	33	F	White	Not Hispanic or Latino	23.3
STM-003	45	F	White	Not Hispanic or Latino	20.6
STM-008	30	M	White	Not Hispanic or Latino	30.2
STM-010	64	F	White	Not Hispanic or Latino	26.1
STM-011	37	F	White	Not Hispanic or Latino	31.9
STM-013	49	F	White	Not Hispanic or Latino	38.1
STM-014	56	F	White	Not Hispanic or Latino	24.3
STM-015	47	F	White	Not Hispanic or Latino	24.9
STM-017	62	M	White	Not Hispanic or Latino	30.1
STM-018	64	M	White	Not Hispanic or Latino	32.2
STM-021	32	F	White	Not Hispanic or Latino	26.4
STM-027	45	F	White	Not Hispanic or Latino	30.8
STM-029	49	F	White	Not Hispanic or Latino	22
STM-036	54	M	White	Not Hispanic or Latino	31.2
STM-037	36	F	White	Hispanic or Latino	22.6
STM-044	27	F	White	Not Hispanic or Latino	27.8
STM-047	43	F	White	Not Hispanic or Latino	28.3
STM-050	40	F	White	Not Hispanic or Latino	20.5
STM-052	38	F	White	Not Hispanic or Latino	24.3
STM-053	51	M	White	Not Hispanic or Latino	25.6
STM-058	25	F	White	Not Hispanic or Latino	20.5
STM-060	48	F	White	Not Hispanic or Latino	48.8
STM-061	38	F	White	Not Hispanic or Latino	21.4
STM-062	57	F	Asian	Not Hispanic or Latino	27.7
STM-069	54	F	White	Not Hispanic or Latino	22.3
STM-072	35	F	White	Not Hispanic or Latino	32.8
STM-076	30	F	White	Not Hispanic or Latino	29.8
STM-078	40	M	White	Not Hispanic or Latino	30.3
STM-086	28	F	White	Not Hispanic or Latino	21.9
STM-088	51	F	White	Not Hispanic or Latino	38.1
STM-091	33	F	White	Not Hispanic or Latino	23.2
STM-094	65	F	White	Not Hispanic or Latino	33.1
STM-098	56	F	White	Not Hispanic or Latino	30.6
STM-100	45	F	White	Not Hispanic or Latino	22.8
STM-104	47	F	White	Not Hispanic or Latino	48.2
STM-110	30	F	White	Not Hispanic or Latino	21.7
STM-111	34	F	White	Not Hispanic or Latino	23.1
STM-121	21	F	White	Not Hispanic or Latino	25
TSC-010	20	F	Black/African American	Not Hispanic or Latino	30.1
TSC-013	20	F	White	Not Hispanic or Latino	17.5
VTH-003	33	F	White	Not Hispanic or Latino	22.9
VTH-005	30	F	White	Not Hispanic or Latino	28.2
VTH-011	52	F	White	Not Hispanic or Latino	26.2
VTH-013	25	F	Multiple	Not Hispanic or Latino	25.2
VTH-020	37	F	White	Not Hispanic or Latino	41.2
VTH-024	23	F	White	Not Hispanic or Latino	20.3
VTH-025	37	F	White	Not Hispanic or Latino	23.3
VTH-028	70	F	White	Not Hispanic or Latino	19
VTH-030	65	F	White	Not Hispanic or Latino	23.9
VTH-032	42	F	White	Not Hispanic or Latino	25.8
VTH-034	74	F	White	Not Hispanic or Latino	24.8
VTH-036	37	F	White	Not Hispanic or Latino	28
VTH-044	56	M	White	Not Hispanic or Latino	43.8
VTH-046	33	F	White	Not Hispanic or Latino	20.5
VTH-049	25	F	White	Not Hispanic or Latino	24.5
VTH-051	63	F	White	Not Hispanic or Latino	30.1
VTH-053	44	F	White	Not Hispanic or Latino	29
