# Supplementary figures and images for: The Effect of Waning on Antibody Levels and Memory B Cell Recall following SARS-CoV-2 Infection or Vaccination
Source: MDPI journal article supplement (doi:10.3390/vaccines10050696), 2022-04-29

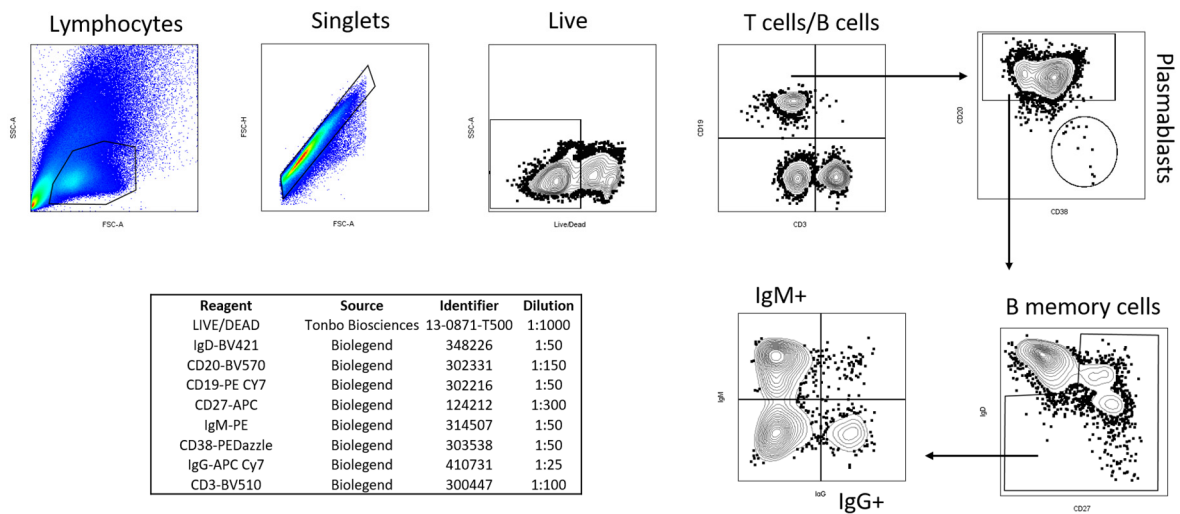

**Figure S1.** Memory B cell gating strategy.

Supplement: s1 [file s1]
